# 1 Development of a Covalent Inhibitor of Gut

## 2 Bacterial Bile Salt Hydrolases

3 Arijit A. Adhikari,<sup>1</sup> Tom C. Seegar,<sup>1</sup> Scott B. Ficarro,<sup>2,3</sup> Megan D. McCurry,<sup>1</sup> Deepti  
4 Ramachandran,<sup>4</sup> Lina Yao,<sup>1</sup> Snehal N. Chaudhari,<sup>1</sup> Sula Ndousse-Fetter,<sup>1</sup> Alexander S. Banks,<sup>4</sup>  
5 Jarrod A. Marto,<sup>2,3</sup> Stephen C. Blacklow,<sup>1</sup> A. Sloan Devlin<sup>1,\*</sup>

6 <sup>1</sup> Department of Biological Chemistry and Molecular Pharmacology, Harvard Medical School,  
7 Boston, Massachusetts 02115, United States

8 <sup>2</sup> Department of Cancer Biology, Department of Oncologic Pathology, Blais Proteomics Center,  
9 Dana-Farber Cancer Institute, Boston, Massachusetts 02115, United States

10 <sup>3</sup> Department of Pathology, Brigham and Women's Hospital and Harvard Medical School,  
11 Boston, Massachusetts 02115, United States

12 <sup>4</sup> Division of Endocrinology, Metabolism, and Diabetes, Beth Israel Deaconess Medical Center,  
13 Boston, Massachusetts 02115, United States

14  
15 \*Correspondence: [sloan\\_devlin@hms.harvard.edu](mailto:sloan_devlin@hms.harvard.edu)

16

17 **Abstract**

18 Bile salt hydrolase (BSH) enzymes are widely expressed by human gut bacteria and catalyze the  
19 gateway reaction leading to secondary bile acid formation. Bile acids regulate key metabolic and  
20 immune processes by binding to host receptors. There is an unmet need for a potent tool to  
21 inhibit BSHs across all gut bacteria in order to study the effects of bile acids on host physiology.  
22 Here, we report the development of a covalent pan-inhibitor of gut bacterial BSH. From a  
23 rationally designed candidate library, we identified a lead compound bearing an alpha-  
24 fluoromethyl ketone warhead that modifies BSH at the catalytic cysteine residue. Strikingly, this  
25 inhibitor abolished BSH activity in conventional mouse feces. Mice gavaged with a single dose  
26 of this compound displayed decreased BSH activity and decreased deconjugated bile acid levels  
27 in feces. Our studies demonstrate the potential of a covalent BSH inhibitor to modulate bile acid  
28 composition in vivo.

29

## 30 **Introduction**

31 Bile acids, long relegated to the role of undistinguished detergents, have recently  
32 emerged as likely candidates for the molecular messengers that allow members of the human gut  
33 microbiome to modulate the physiology and behavior of their hosts.<sup>1,2</sup> Investigating these  
34 potential roles in detail has been hampered by the lack of tools to regulate specific messages, and  
35 developing the appropriate tools has been hampered in turn by the complex biosynthesis of bile  
36 acids. Primary bile acids are produced in the liver from cholesterol and conjugated to taurine or  
37 glycine to produce primary conjugated bile acids (**Fig. 1a**). These molecules are stored in the  
38 gallbladder and released into the digestive tract where they aid in absorption of lipids and fat-  
39 soluble vitamins. Over 95% of bile acids are reabsorbed in the ileum and transported to the liver.  
40 The remaining ~5% pass into the colon, where the majority of gut bacteria reside. Gut bacteria  
41 then enzymatically modify these primary bile acids, producing a group of molecules called  
42 secondary bile acids (**Fig. 1a**). Roughly 50 secondary bile acids have been detected in human  
43 feces, and their concentrations can reach low millimolar levels.<sup>3,4</sup>

44 Bile acids, which share a carbon skeleton with steroids, can bind to host receptors,  
45 including nuclear hormone receptors (Nhr) and G-protein coupled receptors (GPCRs). By acting  
46 as either agonists or antagonists for these receptors, bile acids regulate host metabolism,  
47 including energy expenditure and glucose and lipid homeostasis,<sup>2,5</sup> and host immune response,  
48 including both innate and adaptive immunity.<sup>6,7</sup> Dysregulated bile acid metabolism is thought to  
49 play causal roles in the pathophysiology of diseases including hypercholesterolemia, obesity,  
50 diabetes, cancer, and gallstone formation,<sup>2,8,9</sup> further highlighting the biological importance of  
51 these molecules.

52 The key reaction in the conversion of primary into secondary bile acids is the hydrolysis  
53 of the C24-amide bond of conjugated primary bile acids (**Fig. 1a**). This enzymatic conversion is

54 performed exclusively by gut bacterial bile salt hydrolase (BSH) enzymes.<sup>1</sup> BSHs (EC 3.5.1.24)  
55 are widespread in human gut bacteria. A recent study identified BSHs in gut species from 117  
56 genera and 12 phyla, including the two dominant gut phyla, Bacteroidetes and Firmicutes, as  
57 well as Actinobacteria and Proteobacteria.<sup>10</sup> A non-toxic, small molecule pan-inhibitor of gut  
58 bacterial BSHs would provide a powerful tool to study how bile acids affect host physiology.  
59 Such a compound should limit bile acid deconjugation across the vast majority of gut strains  
60 without significantly affecting the growth of these bacteria. The use of a pan-inhibitor in vivo  
61 would significantly alter bile acid pool composition, shifting the pool toward conjugated bile acids  
62 and away from deconjugated bile acids and secondary bile acids (**Fig. 1a**). This chemical tool  
63 would thus allow researchers to investigate previously unanswered questions, including how  
64 primary and secondary bile acids differentially affect physiology in a fully colonized host.

65       Herein, we report the development of a covalent inhibitor of bacterial BSHs using a  
66 rational design approach. Importantly, this compound completely inhibits BSH activity in  
67 conventional mouse feces, demonstrating its potential utility as a pan-inhibitor of BSHs.

68

## 69 **Results**

### 70 **Rational design of covalent small molecule inhibitors of bile salt hydrolases**

71       In order to generate potent, long-lasting inhibitors of BSHs, we chose to develop covalent  
72 inhibitors of these gut bacterial enzymes. Covalent inhibitors have gained renewed interest in the  
73 field of drug discovery due to their ability to inactivate their protein target with a high degree of  
74 potency and selectivity even in the presence of large concentrations of native substrate.<sup>11</sup> The  
75 substrates for BSHs, conjugated bile acids, are found in high concentrations in the colon (1-10  
76 mM),<sup>12</sup> suggesting that covalent inhibition could be an effective strategy for targeting these  
77 enzymes. In addition, recently developed irreversible inhibitors of bacterial cutC both block

78 production of trimethylamine N-oxide and display minimal off-target effects.<sup>13</sup> This work  
79 demonstrates that covalent inhibitors of bacterial enzymes can be effective in the gut, thus  
80 further validating our approach.

81 While there is significant divergence in BSH protein sequence across gut strains, all BSHs  
82 possess a conserved active site that includes a catalytic cysteine (Cys2).<sup>1,10</sup> This residue performs  
83 the nucleophilic attack on the substrate carbonyl, resulting in amide bond cleavage (**Fig. 1b**). We  
84 reasoned that by designing compounds that targeted this highly conserved Cys residue, we could  
85 develop pan-BSH inhibitors. A co-crystal structure of the BSH from Gram positive species  
86 *Clostridium perfringens* and the substrate taurodeoxycholic acid (TDCA) showed that  
87 hydrophobic interactions held the bile acid core in place and oriented the amide bond toward the  
88 conserved cysteine, leaving the amino acid solvent-exposed (**Fig. 1c**).<sup>14</sup> Furthermore, purified *C.*  
89 *perfringens* BSH tolerates a large degree of variability in the amino acid side chain, including  
90 longer chain conjugates.<sup>15</sup> These results suggested that the bile acid D-ring side chain was a  
91 possible site for incorporation of electrophilic groups into our inhibitors.

92 Based on this rationale, we designed a small library of potential inhibitors containing  
93 both a bile acid core motif to selectively target BSHs and a pendant electrophilic warhead to  
94 irreversibly bind the inhibitor to the enzyme (**Fig. 1d**). While previous literature suggested that  
95 BSH enzymes catalyze amide bond cleavage of all conjugated bile acids regardless of the  
96 steroidal core,<sup>1,8</sup> we recently determined that some species from the abundant Gram negative gut  
97 bacterial phylum Bacteroidetes cleave C12 = H but not C12 = OH primary bile acids (**Fig. 1a**).<sup>16</sup>  
98 As our goal was to develop BSH inhibitors that target both Gram negative and Gram positive  
99 strains, we decided to utilize the steroidal portion of the human primary bile acid  
100 chenodeoxycholic acid (CDCA, C12 = H) as our scaffold.

101 For the electrophilic trapping groups, we chose warheads that have been successfully deployed  
102 in the development of selective and potent protease and kinase inhibitors,<sup>17,18</sup> including  
103 isothiocyanate (**1**),<sup>19</sup> cyanoacrylate (**2**),<sup>20</sup>  $\alpha,\beta$ -unsaturated systems (**3** and **4**),<sup>21</sup> acrylamide (**5**),<sup>22</sup>  
104 and nitrile (**6**).<sup>23</sup> We also included an inhibitor with an  $\alpha$ -fluoromethyl ketone warhead (FMK)  
105 (**7**) in our library. Covalent inhibitors with this warhead have been shown to display high potency  
106 and selectivity.<sup>24-26</sup> In contrast to the more electrophilic  $\alpha$ -iodo-,  $\alpha$ -bromo- and  $\alpha$ -chloromethyl  
107 ketone warheads, the weak leaving group ability of fluorine renders the FMK warhead less  
108 reactive and hence more selective.<sup>24,26,27</sup> As a result, FMK-based inhibitors have been shown  
109 to result in minimal off-target effects.<sup>24,28</sup>

#### 110 **Biochemical characterization of BSHs**

111 Following inhibitor synthesis (**Supplementary Note**), we next sought to evaluate the  
112 activity of inhibitors **1-9** biochemically against both Gram negative and Gram positive BSHs. In  
113 particular, we decided to use a selective *Bacteroides* BSH for inhibitor optimization, reasoning  
114 that the more limited substrate scope of this enzyme could make it more difficult to target. We  
115 heterologously expressed and purified the selective BSH (BT2086) that we had previously  
116 identified in *Bacteroides thetaiotaomicron* VPI-5482 (*B. theta*).<sup>16</sup> We then established kinetic  
117 parameters for its hydrolysis of conjugated primary and secondary bile acids using a ninhydrin-  
118 based assay.<sup>29</sup> Consistent with our previous results from *B. theta* cultures, purified *B. theta* BSH  
119 displayed a preference for TDCA deconjugation and did not deconjugate TCA (**Table 1** and  
120 **Supplementary Fig. 1**).<sup>16</sup> These results suggest that the enzymatic selectivity observed in *B.*  
121 *theta* culture was due to inherent biochemical properties of the BSH, not to differences in  
122 transport or the accessibility of the substrates to the enzyme.

123 We also cloned and expressed the known BSH from the Gram positive strain  
124 *Bifidobacterium longum* SBT2928 BSH<sup>30</sup> and determined the kinetic parameters of this enzyme  
125 (**Table 1** and **Supplementary Fig. 1**). Notably, the  $K_m$  values for all of the recognized substrates  
126 are in the low millimolar range, which is approximately the concentration of these bile acids in  
127 the gut. While the  $k_{cat}$  values for both enzymes are lower than the  $k_{cat}$  reported for the BSH from  
128 *Lactobacillus salivarius*, the  $K_m$  values for these enzymes are similar to those of previously  
129 characterized BSH.<sup>30-32</sup>

### 130 **Biochemical evaluation identifies $\alpha$ -FMK compound 7 as lead inhibitor**

131 We next evaluated the ability of the compounds in our library to inhibit *B. theta* and *B.*  
132 *longum* BSH. We also tested riboflavin (**10**) and caffeic acid phenethyl ester (CAPE, **11**),  
133 compounds that had been previously identified in a high throughput screen for inhibition of a  
134 BSH from a *Lactobacillus salivarius* chicken gut isolate.<sup>33</sup> (**Fig. 1e**). To determine the BSH  
135 inhibitory activity of these compounds, we pre-incubated the *B. theta* BSH with each inhibitor  
136 (100  $\mu$ M) for 30 minutes and then added a mixture of conjugated bile acids (100  $\mu$ M final  
137 concentration). Hydrolysis of bile acids was monitored by Ultra Performance Liquid  
138 Chromatography-Mass Spectrometry (UPLC-MS) over 21 hours. Among the synthesized  
139 inhibitors, isothiocyanate (**1**) displayed modest inhibition. Other compounds containing Michael  
140 acceptor warheads (inhibitors **2-6**) did not inhibit deconjugation. In contrast, incubation with the  
141  $\alpha$ -FMK-based inhibitor **7** resulted in almost complete inhibition of the *B. theta* BSH activity for  
142 21 hours (>98%, **Fig. 2a** and **Supplementary Fig. 2**). In order to validate that the inhibitory  
143 activity of compound **7** was due to the presence of fluorine as a leaving group, we synthesized a  
144 methyl ketone analog lacking the fluorine atom (**8**).<sup>28</sup> This analog did not display BSH inhibition  
145 against either recombinant protein or growing *B. theta* cultures, indicating that the  $\alpha$ -fluorine

146 group was necessary for activity (**Fig. 2a** and **Supplementary Fig. 3**). Riboflavin did not display  
147 any inhibitory activity, while CAPE provided only moderate inhibition of *B. theta* BSH.

148 We next evaluated the activity of our two most potent inhibitors against *B. theta* BSH,  
149 compounds **1** and **7**, as well as CAPE, against the BSH from the Gram positive species *B.*  
150 *longum*. These compounds displayed similar degrees of inhibition of *B. longum* BSH as we had  
151 observed against *B. theta* BSH. Compound **7** was again the most active inhibitor, while CAPE  
152 was ineffective at inhibiting deconjugation by *B. longum* BSH at all timepoints (**Fig. 2b** and  
153 **Supplementary Fig. 2**). These data indicate that compound **7** is a potent inhibitor of purified  
154 BSH protein from both a Gram negative and a Gram positive bacterial strain.

#### 155 **Compound 7 inhibits BSH activity in growing cultures of gut bacteria**

156 Given that compound **7** displayed activity against purified BSHs, we next sought to  
157 evaluate the potency of this inhibitor in growing bacterial cultures. In order to test the scope of  
158 BSH inhibition, we included three Gram negative and three Gram positive strains of human gut  
159 bacteria known to possess BSH activity (Gram negative, *B. theta*, *Bacteroides fragilis* ATCC  
160 25285, and *Bacteroides vulgatus* ATCC 8482; Gram positive, *Lactobacillus plantarum* WCFS1,  
161 *Clostridium perfringens* ATCC 13124, and *Bifidobacterium adolescentis* L2-32) in our  
162 screen.<sup>1,16</sup>

163 Bacterial cultures were diluted to pre-log phase and both inhibitor (100  $\mu$ M) and a  
164 mixture of conjugated bile acids (100  $\mu$ M final concentration) were added simultaneously.  
165 Deconjugation was monitored over 24 hours using UPLC-MS. Strikingly, while all six bacterial  
166 strains deconjugated bile acids in the presence of vehicle control, we observed almost no  
167 deconjugation in any of the cultures grown in the presence of compound **7** (**Fig. 2c**). Compound  
168 **7** did not significantly affect the cell viability of the majority of the tested strains (**Fig. 2d**),



169 indicating that the BSH inhibition observed was not due to bactericidal activity. To quantify the  
170 potency of compound **7**, we determined that the IC<sub>50</sub> values of this inhibitor against the Gram  
171 negative strain *B. theta* and the Gram positive strain *B. adolescentis* were 912 nM and 240 nM,  
172 respectively (**Supplementary Fig. 4**). Taken together, these results indicate that compound **7** is a  
173 potent, broad-spectrum inhibitor of BSHs.

174 In contrast, we observed no inhibition of deconjugation over the course of 21 hours in  
175 five out of the six bacterial strains grown in the presence of CAPE (100 μM) (**Fig. 2c**). CAPE  
176 was found to inhibit deconjugation in *L. plantarum*, suggesting that this compound may inhibit  
177 BSHs from *Lactobacilli* but is not a broad-spectrum BSH inhibitor. Moreover, CAPE inhibited  
178 the cell viability of all three Gram negative bacterial strains tested (**Fig. 2d**, ~200-fold, ~8000-  
179 fold, and ~4000-fold decreases in 24h CFU/mL compared to DMSO control for *B. theta*, *B.*  
180 *fragilis*, and *B. vulgatus*, respectively). These results suggest that the dominant effect of CAPE  
181 on Gram negative bacteria is not inhibition of BSH activity but rather inhibition of growth.

182 Finally, to evaluate our hypothesis that C12 = OH compounds would not be effective  
183 broad-spectrum inhibitors, we synthesized a potential inhibitor in which we appended the α-  
184 FMK warhead to a C12 = OH bile acid core, cholic acid (compound **9**, **Fig. 1d**). Compound **9**  
185 displayed significantly reduced ability to inhibit BSH deconjugation in growing *B. theta* cultures  
186 compared to compound **7** (**Supplementary Fig. 3**). These results support the hypothesis that bile  
187 acid core structure, specifically C12 substitution, affects the ability of our probes to inhibit  
188 selective BSH. In addition, these results suggest that the α-FMK warhead is not broadly reactive  
189 but rather requires suitable positioning within the active site, a hypothesis that we further  
190 investigated using mass spectrometry and crystallography studies.

191 **Compound 7 covalently modifies the catalytic cysteine residue of BSH**

192 With the potency of compound **7** established, we next investigated its mechanism of  
193 inhibition. The *B. theta* BSH contains two cysteine residues, Cys2 and Cys67. Analysis of an apo  
194 crystal structure of this enzyme revealed that both the cysteine residues are pointed towards the  
195 active site, indicating either residue could be a potential site for covalent modification (PDB  
196 3HBC). To confirm that compound **7** is a covalent inhibitor that modifies Cys2, we incubated  
197 purified BSH enzyme with an excess of this molecule. Analysis by mass spectrometry revealed a  
198 mass shift consistent with the addition of a single molecule of compound **7**, confirming  
199 formation of a covalent bond (**Fig. 3a**). Subsequent top-down mass spectrometry analysis  
200 identified Cys2 as the modified residue (**Fig. 3b**).

201 In order to elucidate the position of the bound inhibitor and guide further inhibitor design,  
202 we determined the structure of the *B. theta* BSH, first in its apo form to 2.7 Å resolution and then  
203 covalently bound to compound **7** to 3.5 Å resolution (**Supplementary Table 1**) (PDB XXX).  
204 The structure of the BSH-inhibitor complex contains four copies of the protein in the asymmetric  
205 unit. The electron density map is best resolved in two of the four subunits, and electron density is  
206 clearly visible for the inhibitor in one of these subunits covalently attached to Cys2 (**Fig. 3c**).  
207 Comparison with the apo structure also suggests that there is a loop (residues 127-138) which  
208 repositions to clasp the inhibitor in the active site in a solvent-exposed channel (**Supplementary**  
209 **Fig. 5**). Taken together, these data indicate that compound **7** selectively labels the *B. theta* BSH  
210 at the catalytic cysteine residue. Furthermore, the co-crystal structure reveals that the C3-  
211 hydroxyl group is solvent-accessible, suggesting that this site might be amenable to further  
212 modification (**Supplementary Fig. 5**).

213 **Compound 7 displays minimal off-target effects**

214 While covalent inhibitors have been shown to be highly potent, concerns have been  
215 raised that non-specific reactivity of these compounds could result in acute toxicity.<sup>11</sup> Our  
216 inhibitors were designed to contain a bile acid core in order to increase selectivity of these  
217 compounds for BSHs. However, bile acids are known to be ligands for host nuclear hormone  
218 receptors (Nhr) and G protein-coupled receptors (GPCR), in particular, the farnesoid X receptor  
219 (FXR) and the G protein-coupled bile acid receptor 1 (GPBAR1, or TGR5).<sup>2</sup> In order to  
220 determine whether compound **7** could act as a ligand for FXR, we performed an in vitro  
221 coactivator recruitment assay.<sup>34</sup> While the known FXR agonist GW4064 showed a clear dose-  
222 dependent increase in the binding of the co-activator peptide SRC2-2 to FXR ( $EC_{50}=50$  nM), the  
223 binding of SRC2-2 to FXR did not increase in the presence of compound **7**, suggesting that this  
224 inhibitor does not activate FXR (**Fig. 4a**). In the presence of GW4064, compound **7** did not  
225 display a dose-dependent curve, indicating that compound **7** does not possess FXR antagonist  
226 activity at physiologically relevant concentrations (**Supplementary Fig. 6**). Next, we evaluated  
227 the effect of compound **7** on TGR5 activation in a human intestinal cell line (Caco-2).  
228 Compound **7** did not agonize TGR5 over the range of concentrations tested (**Fig. 4b**). In  
229 addition, compound **7** did not antagonize TGR5 in the presence of known TGR5 agonist LCA  
230 (10  $\mu$ M) (**Supplementary Fig. 6**). These results suggest that compound **7** does not induce off-  
231 target effects on either of these critical host receptors.

232 In addition to their effects on host receptors, bile acids are known to be toxic to cells due  
233 to their detergent properties.<sup>1,35</sup> Because the expected in vivo area of action of compound **7** is the  
234 lower gut, we tested the toxicity of this compound against human intestinal cells (Caco-2). No  
235 resultant toxicity was observed when these cells were incubated with up to 50  $\mu$ M of compound  
236 **7** (**Fig. 4c**). Because the  $IC_{50}$  values of compound **7** against bacterial BSHs range from 240 to

237 912 nM, these results suggest that it should be possible to achieve an effective in vivo dose at a  
238 concentration that will not result in toxicity to intestinal cells. Taken together, our results indicate  
239 that compound **7** is both non-toxic and selective for bacterial BSHs over potential host targets.

#### 240 **Compound 7 inhibits BSH activity in conventional mouse feces**

241 While we were able to demonstrate the potency of compound **7** against growing cultures  
242 of six different strains of gut bacteria, there are hundreds of bacterial species in the human gut.<sup>36</sup>  
243 Previous literature had reported significant BSH activity in mouse feces.<sup>37</sup> To further assess  
244 whether compound **7** is a pan-inhibitor of BSH, we tested its activity in resuspended feces from  
245 conventional mice. Compounds **1**, **7**, and CAPE (20  $\mu$ M) were added to a fecal suspension in  
246 buffer. After 30 minutes, the deuterated substrate GCDCA-d4 was added, and deconjugation was  
247 quantified after 18 hours using UPLC-MS (**Fig. 5a**). Strikingly, we observed that incubation with  
248 compound **7** completely inhibited the BSH activity in feces (**Fig. 5b**). Consistent with our in  
249 vitro results, CAPE provided no inhibition of BSH activity in mouse feces. These results  
250 demonstrate that compound **7** is a potent, pan-inhibitor of gut bacterial BSH activity.

#### 251 **Single dose of compound 7 inhibits BSH activity in conventional mice**

252 Having established the potency of compound **7** in vitro, we next sought to evaluate the  
253 activity of this inhibitor in conventional mice. C57BL/6 mice were gavaged with a single dose of  
254 either compound **7** (10 mg/kg) or vehicle control, and BSH activity was monitored over time in  
255 half-day increments until 2.5 days post-gavage (**Fig. 5c**). We predicted that if compound **7** was  
256 active in vivo, we would observe an initial decrease in BSH activity followed by recovery of  
257 activity. Gratifyingly, we observed this expected effect. One day and 1.5 days post-gavage, we  
258 noted a significant decrease in BSH activity in feces, while at subsequent timepoints, BSH  
259 activity recovered (**Fig. 5d**). Consistent with these results, we observed a significant increase in

260 conjugated bile acids and a decrease in deconjugated bile acids 1 day-post gavage. Notably, we  
261 observed a decrease in the deconjugated secondary bile acid deoxycholic acid (DCA) at this  
262 timepoint (**Fig. 5e**). In agreement with our in vitro bacterial cell viability results, we did not  
263 observe a significant decrease in bacterial biomass following gavage with compound **7** (**Fig. 5f**  
264 and **Supplementary Fig. 7**). Taken together, our results indicate that compound **7** can inhibit gut  
265 bacterial BSH activity and modulate the bile acid pool in vivo while not significantly inhibiting  
266 overall growth of the gut bacterial community.

## 267 **Discussion**

268 In order to uncover the effects that bacterial metabolites have on host health, tools are  
269 needed that selectively control the levels of these compounds in fully colonized animals. In this  
270 work, we report the development of such a chemical tool, a potent, selective, pan-inhibitor of gut  
271 bacterial BSHs. We identified a lead inhibitor, compound **7**, that effectively inhibits  
272 deconjugation by purified BSH protein, growing cultures of both BSH-containing Gram negative  
273 and Gram positive human gut strains, and resuspended conventional mouse feces. We then  
274 showed that a single dose of compound **7** administered to conventional mice reduces BSH  
275 activity and predictably shifts the in vivo bile acid pool. Importantly, we found that compound **7**  
276 does not significantly affect the viability of these bacteria.

277 Our results suggest that compound **7** or derivatives thereof can be used as tools to study  
278 the biological roles of primary and secondary bile acids in conventional animals, including both  
279 wild-type and knock-out mouse strains. These investigations would broaden our understanding  
280 of how bile acids affect host immune and metabolic systems and reveal how these metabolites  
281 affect the composition and biogeography of the gut bacterial community.

282           In particular, BSH inhibitors could be used to better understand the effects of bile acids  
283 on host metabolism. Previous studies have reported conflicting results about how altering BSH  
284 activity in vivo may affect host metabolic responses.<sup>37,39</sup> In these studies, the introduction into  
285 the gut of an exogenous bacterial strain overexpressing a heterologous gene or the use of a  
286 molecule that may exert metabolic effects through a BSH-independent mechanism do not permit  
287 evaluation of how BSH activity affects metabolism in the native host-bacterial system.  
288 Moreover, in previous work, we showed that deleting the BSH-encoding gene from *B. theta*  
289 resulted in decreased weight gain and a decreased respiratory exchange ratio in mice colonized  
290 with this bacterium compared to mice colonized with the *B. theta* wild-type strain.<sup>16</sup> However,  
291 these experiments were performed in monocolonized germ-free mice and do not reveal how  
292 limiting activity of all BSHs will affect the metabolism of conventional animals. Use of a non-  
293 toxic, pan-BSH inhibitor would enable investigation of how BSH activity directly affects  
294 metabolism in fully colonized hosts.

295           In addition, BSH inhibitors could enable investigation of how bile acids affect host  
296 immune response in the context of liver cancer. A recent study proposed a causal connection  
297 between the conversion of primary to secondary bile acids and a decrease in a tumor-suppressive  
298 environment in the liver mediated by the accumulation of beneficial NKT cells.<sup>40</sup> Use of a BSH  
299 inhibitor in mouse models of liver cancer could further test this hypothesis by shifting the  
300 endogenous in vivo bile acid pool toward primary bile acids without significantly perturbing the  
301 enterohepatic system and the microbial community.

302           Finally, because BSH inhibitors would remove secondary bile acids from the bile acid  
303 pool, such inhibitors could be used in chemical complementation experiments in which  
304 individual secondary bile acids were reintroduced through feeding. These studies would reveal

305 how specific secondary bile acids affect host physiology and bacterial community composition in  
306 conventional animals. Looking ahead, if use of BSH inhibitors in vivo beneficially affects host  
307 physiology, by limiting liver tumor growth, for example, or decreasing liver steatosis, these  
308 compounds could be developed as novel drug candidates. In this way, development of  
309 mechanism-based, non-toxic chemical probes for bacterial enzymes could lay the groundwork  
310 for potential therapeutic agents that target the microbiome.<sup>13,38</sup>

311

312

### 313 **Acknowledgements**

314 This research was supported National Institutes of Health (NIH) grant R35 GM128618 (A.S.D),  
315 R35 CA220340 (S.C.B.), R01 CA222218 (J.A.M.), an Innovation Award from the Center for  
316 Microbiome Informatics and Therapeutics at MIT (A.S.D), a grant from Harvard Digestive  
317 Diseases Center (supported by NIH grant 5P30DK034854-32) (A.S.D), a Karin Grunebaum  
318 Cancer Research Foundation Faculty Research Fellowship (A.S.D), a John and Virginia Kaneb  
319 Fellowship (A.S.D), a Quadrangle Fund for the Advancement and Seeding of Translational  
320 Research at Harvard Medical School (Q-FASTR) grant (A.S.D), and an HMS Dean's Innovation  
321 Grant in the Basic and Social Sciences (A.S.D). L.Y. and S.N.C. acknowledge a Wellington  
322 Postdoctoral Fellowship and an American Heart Association Postdoctoral Fellowship,  
323 respectively. M.D.M. acknowledges an NSF Graduate Research Fellowship (DGE1745303).  
324 D.R. is supported by a grant from the Swiss National Science Foundation. We are indebted to  
325 Nathanael Gray, David Scott, John M. Hatcher, Jinhua Wang, Jon Clardy, Matthew Henke, and  
326 members of the Clardy group for helpful discussions. We thank the ICCB-Longwood Screening  
327 Facility for use of their fluorescent plate reader.

## 328 **Author Contributions**

329 A.A.A and A.S.D conceived the project and designed the experiments. A.A.A. performed most  
330 of the experiments. T.C.S. and S.C.B. performed the crystallization studies. S.B.F. and J.A.M.  
331 performed the mass spectrometry studies. D. R. and A.S.B. performed the in vivo experiment  
332 and provided fresh mouse feces. M.D.M. purified and performed experiments with *B. longum*  
333 BSH. L.Y. performed the in vitro FXR assays and provided help with experiments. S.N.C.  
334 performed the cell culture assays. S.N. assisted with bacterial culture experiments. A.A.A. and  
335 A.S.D wrote the manuscript. All authors edited and contributed to the critical review of the  
336 manuscript.

## 337 **Competing Interests Statement**

338 A. Sloan Devlin is a consultant for Kintai Therapeutics. S.C.B. is a consultant on unrelated  
339 projects for Ayala Pharmaceutical and IFM Therapeutics, and receives funding from Novartis for  
340 an unrelated project. J.A.M. serves on the SAB of 908 Devices (Boston, MA). The other authors  
341 declare that no competing interests exist.

342

## 343 **Figure Legends**

344 **Figure 1. Rational design of small molecule inhibitors of gut bacterial bile salt hydrolase**  
345 **(BSH) enzymes. (a)** BSHs are the gateway enzymes in the conversion of primary (host-  
346 produced) to secondary (bacterially produced) bile acids. Inhibition of BSHs should result in a  
347 decrease in deconjugated primary and secondary bile acids. **(b)** Mechanism of enzymatic amide  
348 bond cleavage by BSHs. **(c)** A co-crystal structure of the BSH from the Gram positive gut  
349 bacterium *Clostridium perfringens* (strain 13 / type A) and deconjugated tauro-deoxycholic acid



350 (TDCA) (PDB 2BJF) guided our inhibitor design. While hydrophobic interactions orient the bile  
351 acid core in the active site, the D-ring side chain and amino acid are exposed to solvent (magenta  
352 residues are within 4Å of bile acid, Cys2 is yellow). (d) Library of synthesized inhibitors.  
353 Electrophilic warheads were appended to the chenodeoxycholic acid bile core in order to create  
354 broad-spectrum BSH inhibitors. (e) BSH inhibitors previously identified from a high-throughput  
355 screen, riboflavin and caffeic acid phenethyl ester (CAPE).

356 **Figure 2. Identification of compound 7 as a potent, non-toxic, broad-spectrum BSH**  
357 **inhibitor.** (a,b) Screen of inhibitors versus *B. theta* BSH (a) and *B. longum* BSH (b) showing %  
358 deconjugation at 2 and 21 hours. Inhibitor (100 µM) was incubated with 200 nM rBSH for 30  
359 mins followed by addition of taurine-conjugated bile acid substrates (tauro-β-muricholic acid,  
360 TβMCA; tauro-cholic acid, TCA; tauro-ursodeoxycholic acid, TUDCA; and tauro-deoxycholic  
361 acid, TDCA, 25 µM each). Deconjugation of substrate was followed by UPLC-MS. Assays were  
362 performed in biological triplicate. (c) Compound 7 inhibited BSH activity in growing cultures of  
363 Gram negative (*B. theta* VPI 5482, *Bacteroides fragilis* ATCC 25285, and *Bacteroides vulgatus*  
364 ATCC 8482) and Gram positive (*Lactobacillus plantarum* WCFS1, *Clostridium perfringens*  
365 ATCC 13124, and *Bifidobacterium adolescentis* L2-32) bacteria. Inhibitor (100 µM of  
366 compound 7 or CAPE) and taurine-conjugated bile acid substrates (TβMCA, TCA, TUDCA and  
367 TDCA, 25 µM each) were added to bacterial cultures at OD<sub>600</sub> 0.1. Bacterial cultures were  
368 allowed to grow into stationary phase and percent deconjugation at 24h was determined by  
369 UPLC-MS. (d) Compound 7 is not bactericidal. Bacterial strains were incubated with conjugated  
370 bile acids (as described in panel a) and compound (100 µM) and plated at 24h to assess the  
371 viability of each strain. CAPE decreased the cell viability of the Gram negative strains tested.  
372 Red downward arrows indicate fold decrease compared to DMSO control. For (c) and (d), one-

373 way ANOVA followed by Dunnett's multiple comparisons test. \* $p < 0.05$ , \*\* $p < 0.01$ , \*\*\* $p < 0.001$ ,  
374 \*\*\*\* $p < 0.0001$ , ns = not significant. All assays were performed in biological triplicate, and data  
375 are presented as mean  $\pm$  SEM.

376 **Figure 3. Compound 7 covalently modifies *B. theta* BSH at the active site cysteine residue.**

377 **(a,b)** Mass spectrometry revealed that compound 7 monolabels *B. theta* BSH. **(a)** Mass spectra  
378 (left) and zero-charge mass spectra (right) of BSH treated with DMSO (top, trace in red) or 10-  
379 fold excess of inhibitor compound 7 for 2 h (bottom, trace in green). A shift in mass of 388 Da is  
380 consistent with covalent modification of BSH with a loss of HF. **(b)** Top-down MS/MS of BSH  
381 treated with 10 fold excess of compound 7. Ions of type c and z are indicated with red and green  
382 glyphs respectively. Ion c3 indicates that modification is on the N-terminus Cys2 residue. **(c)** X-  
383 ray structure of compound 7 bound to *B. theta* BSH. The BSH (cyan) is shown in ribbon  
384 representation, with indicated side chains (cyan, with heteroatoms in CPK colors) rendered as  
385 sticks. Compound 7 (green, with heteroatoms in CPK colors) is rendered in stick form. There is  
386 electron density visible at the active site of one of the four subunits in the asymmetric unit,  
387 consistent with the conclusion that the inhibitor is covalently attached to Cys2. Panel C was  
388 prepared using PYMOL software (Schroedinger).

389 **Figure 4. Compound 7 exhibits minimal off-target effects. (a)** Compound 7 is not an farnesoid

390 X receptor (FXR) agonist as determined by an FXR coactivator recruitment assay.  $n=4$  biological  
391 replicates per concentration. **(b)** Compound 7 is not a G protein-coupled bile acid receptor  
392 (GPBAR1 / TGR5) agonist. Endogenous TGR5 agonist activity was measured by incubating  
393 Caco-2 cells with varying concentrations of compound 7 overnight. **(c)** Compound 7 did not  
394 display toxicity toward Caco-2 cells up to a concentration of 50  $\mu$ M. For **(b)** and **(c)**,  $n \geq 3$

395 biological replicates per concentration, one-way ANOVA followed by Dunnett's multiple  
396 comparisons test, ns = not significant, \*\*\*\*p<0.0001. All data are presented as mean  $\pm$  SEM.

397 **Figure 5. Compound 7 inhibits BSH activity ex vivo and in vivo.** (a) Fecal BSH activity assay  
398 design. Freshly collected feces from conventional mice were resuspended in PBS (1 mg/mL) and  
399 incubated with 20  $\mu$ M of inhibitor (Compound 1, 7 or CAPE) for 30 mins.  
400 Glycochenodeoxycholic acid-*d4* (GCDCA-*d4*, 100  $\mu$ M) was added as a substrate and  
401 deconjugation was determined by UPLC-MS after 18 hours. (b) Compound 7 inhibited BSH  
402 activity in a fecal slurry. Assays were performed in biological triplicate. (c-e) Treatment of  
403 conventional mice with a single dose of compound 7 resulted in recoverable inhibition of BSH  
404 activity and a shift toward conjugated bile acids. n=4 mice per group, Welch's t test, \*p<0.05,  
405 \*\*p<0.01, ns = not significant. (c) Design of in vivo BSH inhibition experiment. Adult male  
406 C57BL/6 mice were gavaged with a single dose of compound 7 (10 mg/kg) or vehicle control.  
407 (d) BSH activity was measured in half-day increments starting 1 day post-gavage. Resuspended  
408 fresh feces from inhibitor- or vehicle-treated groups were incubated with substrate (GCDCA-*d4*,  
409 100  $\mu$ M) for 25 min and deconjugation was quantified by UPLC-MS. (e) Fecal bile acid  
410 composition 1 day post-gavage. Deconjugated bile acids, including the secondary bile acid  
411 deoxycholic acid (DCA), were decreased in the inhibitor-treated group. (f) Microbial biomass  
412 did not differ between the inhibitor- and vehicle-treated groups 1 day or 2.5 days post-gavage.  
413 n=4 mice per group, Mann-Whitney test. All data are presented as mean  $\pm$  SEM.

414 **Table 1: Kinetic parameters for BSHs from *Bacteroides thetaiotaomicron* (*B. theta*) and**  
415 ***Bifidobacterium longum* (*B. longum*).**

| BSH source <sup>a</sup> | Substrate <sup>b</sup> | $k_{cat}$ ( $\text{min}^{-1}$ ) | $K_m$ (mM) | $k_{cat}/K_m$<br>( $\text{min}^{-1}\text{mM}^{-1}$ ) |
|-------------------------|------------------------|---------------------------------|------------|------------------------------------------------------|
|-------------------------|------------------------|---------------------------------|------------|------------------------------------------------------|

|                  |                  |            |         |           |
|------------------|------------------|------------|---------|-----------|
| <i>B. theta</i>  | TCA <sup>c</sup> | --         | --      | --        |
|                  | TUDCA            | 15.3 ± 0.8 | 8.2±1.0 | 1.9 ± 0.3 |
|                  | TDCA             | 12.9 ± 0.6 | 3.4±0.6 | 3.8 ± 0.7 |
|                  | TCDCa            | 4.3 ± 0.6  | 2.9±1.8 | 4.3 ± 0.9 |
| <i>B. longum</i> | TCA              | 6.9 ± 0.9  | 8.3±2.5 | 0.8 ± 0.3 |
|                  | TUDCA            | 0.9 ± 0.2  | 4.1±2.5 | 0.2 ± 0.1 |
|                  | TDCA             | 3.5 ± 0.1  | 2.3±0.3 | 1.5 ± 0.2 |
|                  | TCDCa            | 4.6 ± 0.6  | 7.0±2.3 | 0.6 ± 0.2 |

416 <sup>a</sup>Characterization was performed using ninhydrin reagent and experiments were performed in  
417 PBS buffer at pH 7.5 and 37 °C. <sup>b</sup>Conjugated primary and secondary bile acid used as substrates  
418 were taurocholic acid (TCA), tauroursodeoxycholic acid (TUDCA), taurodeoxycholic acid  
419 (TDCA), taurochenodeoxycholic acid (TCDCa). <sup>c</sup>*B. theta* did not deconjugate TCA.

420

## 421 **Online Methods**

422 **Reagents.** All bile acids were commercially purchased from Steraloids Inc. and Sigma Aldrich.  
423 Stock solutions of all bile acids and inhibitors were prepared in molecular biology grade DMSO  
424 (Sigma Aldrich) at 1000X concentrations. These bile acid stock solutions were also used for  
425 establishing standard curves. Solvents used for preparing UPLC-MS samples were HPLC grade.  
426 New biological materials reported here are available from the authors upon request.

427 **Chemical Synthesis.** See supplementary information for detailed procedures and  
428 characterization data of all compounds.

429 **Bacterial Culturing.** All bacterial strains were cultured at 37 °C in Cullen-Haiser Gut (CHG)  
430 media supplemented with hemin and Vitamin K. All strains were grown under anaerobic  
431 conditions in a anaerobic chamber (Coy Lab Products Airlock) with a gas mix of 5% hydrogen  
432 and 20% carbon dioxide nitrogen. *Escherichia coli* was grown aerobically at 37 °C in LB  
433 medium supplemented with ampicillin to select for the pET21b plasmid.

434 **Protein Expression and Purification.**

435 ***B. thetaiotaomicron* rBSH.** The gene encoding BT2086 (without the leader sequence) was  
436 codon-optimized for *E. coli* and cloned into pET-21b(+) vector containing a C-terminal His<sub>6</sub> tag.  
437 The expression plasmid was then transformed into BL21(DE3)pLysS *Escherichia coli* (New  
438 England Biolabs) cells under ampicillin selection. Overnight starter cultures were grown in LB  
439 media with ampicillin (50 µg/mL) and diluted 1:1000 in fresh LB media with ampicillin and  
440 grown at 37 °C. Expression was induced at an OD<sub>600</sub> of 0.6-0.7 by the addition of 1 mM  
441 isopropyl-1-thio-D-galactopyranoside (IPTG) and further incubated at 18 °C overnight. The cells  
442 were pelleted by centrifugation at 7,000g for 20 mins at 4°C. The pelleted cells were then  
443 resuspended in buffer (50 mM sodium phosphate at pH 7.5, 300 mM NaCl, 5% glycerol) along  
444 with 20 mM imidazole, 1mM phenylmethylsulfonyl fluoride (PMSF), and 0.25 mM tris(2-  
445 carboxyethyl)phosphine hydrochloride (TCEP). The resuspended cells were sonicated and then  
446 pelleted by centrifugation at 16,000g for 20 mins at 4 °C. The supernatant was then mixed with  
447 pre-formed Ni-NTA for 45 mins at 4 °C. The slurry was loaded onto a column and allowed to  
448 drain under gravity. The nickel-bound protein was eluted with buffer (50 mM sodium phosphate  
449 at pH 7.5, 300 mM NaCl, 0.25 mM TCEP, 5% glycerol) containing gradually increasing  
450 concentration of imidazole. Collected fractions were tested for purity by SDS-PAGE. The pure  
451 fractions were combined and concentrated followed by dialysis using the storage buffer (50 mM  
452 sodium phosphate at pH 7.5, 300 mM NaCl, 0.25 mM TCEP and 5% glycerol).

453 For crystallization purposes, the protein was further purified using S200 size exclusion column  
454 (from GE) on a BioRad FPLC in 50 mM tris(hydroxymethyl)aminomethane buffer with 300 mM  
455 NaCl, 0.25 mM TCEP and 5% glycerol at pH 7.5.

456 ***B. adolescentis* rBSH.** Recombinant BSH from *B. adolescentis* SBT2928 was expressed and  
457 purified as above, except 0.25 mM IPTG was used for protein expression and 1 mM TCEP for  
458 protein purification.

459 **Enzyme Kinetics.** The enzyme was characterized using a modified BSH activity assay.<sup>29</sup> To  
460 144.8  $\mu$ L reaction buffer (PBS at pH 7.5 containing 10 mM TCEP and 5% glycerol), 35.2  $\mu$ L of  
461 recombinant BSH was added as a solution in PBS at pH 7.5 containing 0.25 mM TCEP and 5%  
462 glycerol to afford a final concentration of 6.2  $\mu$ M and 7.0  $\mu$ M for *B. theta* BSH and *B. longum*  
463 BSH, respectively. This solution was preheated to 37 °C in a water bath. 20  $\mu$ L of a conjugated  
464 bile acid in DMSO at appropriate concentration was preheated to 37 °C in a water bath and  
465 added to the above solution. At every time interval 15  $\mu$ L of the mixture was quenched with 15  
466  $\mu$ L of 15% trichloroacetic acid. The cloudy solution was then centrifuged at 4,200 x g for 15  
467 mins. 10  $\mu$ L of the supernatant was added to 190  $\mu$ L of ninhydrin mix (15 mL of 1% [wt/vol]  
468 ninhydrin in 0.5 M sodium citrate at pH 5.5, 36mL glycerol and 6 mL 0.5 M sodium citrate  
469 buffer at pH 5.5) and the mixture was then heated to 100 °C in a BioRad thermocycler for 18  
470 mins. The obtained solution was cooled at 4 °C for 20 mins and absorbance was measured at 570  
471 nm using a spectrophotometer (Molecular Devices).

472 **Inhibitor Screen Using rBSHs.** 200 nM of BSH was incubated with 100  $\mu$ M of inhibitor at 37  
473 °C for 30 mins in 3 mL PBS buffer containing 0.25 mM TCEP and 5% glycerol at pH 7.5. 100  
474  $\mu$ M Bile acid pool consisting of TCA, T $\beta$ MCA, TUDCA and TDCA (25  $\mu$ M each) was added to  
475 the above solution and incubated at 37 °C. At timepoint intervals, 1 mL of the above buffer  
476 solution was acidified to pH = 1 using 6M HCl and extracted twice with 1mL ethyl acetate. The  
477 combined organic layers were then dried using a Biotage TurboVap LV. The dried extracts were

478 resuspended in 1:1 methanol:water. Samples were analyzed by UPLC-MS (Agilent Technologies  
479 1290 Infinity II UPLC system coupled online to an Agilent Technologies 765 6120 Quadrupole  
480 LC/MS spectrometer in negative electrospray mode) using a previously published bile acid  
481 analysis method.<sup>16</sup>

482 **Inhibitor Screen in Bacteria.** Overnight starter cultures of bacteria were diluted to OD<sub>600</sub> of  
483 0.1 in 4 mL CHG media containing 100 μM of the taurine conjugated bile acid pool consisting of  
484 TCA, TβMCA, TDCA and TUDCA (25 μM each) and various inhibitors at a concentration of  
485 100 μM. These cultures were then allowed to grow anaerobically at 37 °C. After 24 hours, serial  
486 dilutions on BHI (Brain Heart Infusion) agar supplemented with vitamin K and hemin were  
487 performed to determine cell viability (CFU/mL), and the cultures were extracted and analyzed as  
488 per the method described in “Inhibitor Screen Using rBSHs”.

489 **Determination of IC<sub>50</sub> Values of Compound 7.** Overnight starter cultures of *B. theta* and *B.*  
490 *adolescentis* were diluted to an OD<sub>600</sub> of 0.1 in 2 mL fresh CHG containing 100 μM TUDCA or  
491 TDCA, respectively, and inhibitor **7** at various concentrations. *B. theta* and *B. adolescentis*  
492 deconjugated TUDCA and TDCA, respectively, to the greatest extent of any of the conjugated  
493 substrates in the Inhibitor Screen in Bacteria assay, and therefore these substrates were used to  
494 determine IC<sub>50</sub> values. Cultures were then allowed to grow anaerobically at 37 °C for 24h (*B.*  
495 *adolescentis*) or 48h (*B. theta*). Longer incubation time was required for *B. theta* because for this  
496 bacterium, significant BSH activity was only observed during stationary phase. Cultures were  
497 extracted and analyzed as per the method described in “Inhibitor screen using rBSH”.

498 **Crystallization, Data Collection, and Structure Determination.** Crystals of BSH and BSH in  
499 complex with compound **7** were grown in 24-well format hanging drops at room temperature.

500 BSH crystals (5 mg/mL) grew from micro seeding after 3 days in 42% tacimate 100 mM Tris pH  
501 7.4. The BSH-compound **7** complex (5.0 mg/mL) crystals grew after 5 d in 21% PEG 3350 and  
502 100 mM X Sodium citrate tribasic dihydrate pH 5.0. Crystals were cryoprotected by  
503 supplementing the mother liquor with 10% 2-methyl-2,4-pentanediol (v/v). Individual crystals  
504 were flash frozen in liquid nitrogen and stored until data collection. Data collection was  
505 performed at Advanced Photon Source NE-CAT beamline 24 ID-C. Diffraction images were  
506 processed and scaled using XDS.<sup>41</sup> To obtain phases for the apo BSH structure, molecular  
507 replacement was performed in Phenix with Phaser<sup>42</sup> choloylglycine hydrolase from *B.*  
508 *thetaitotaomicron*, PDB 3HBC as the search model. Iterative model building and reciprocal space  
509 refinement was performed in COOT<sup>43</sup> and phenix.refine,<sup>44</sup> respectively. Reciprocal space  
510 refinement used reciprocal space optimization of xyz coordinates, individual atomic B-factors,  
511 NCS restraints, optimization for X-ray/stereochemistry weights, and optimization for X-ray/ADP  
512 weights. The BSH-compound **7** structure was phased using molecular replacement for all four  
513 copies in the asymmetric unit with the apo BSH as a search model. Iterative model building and  
514 refinement for the BSH-compound **7** was similar to the apo BSH structure with changes to  
515 grouping atomic B-factors and the addition of an applied twinlaw of  $k\ h\ -l$ . Model quality for  
516 both structures was evaluated using composite omit density maps. In final cycles of model  
517 building, NCS restraints were removed. Final model quality was assessed using MolProbity.<sup>45</sup>  
518 All crystallographic data processing, refinement, and analysis software was compiled and  
519 supported by the SBGrid Consortium.<sup>46</sup> Data acquisition and refinement statistics are presented  
520 in **Supplementary Table 1**. Figures were prepared using Pymol (Schrödinger).

521 **Mass Spectrometry Analysis.** BSH protein was incubated with DMSO or a 10-fold molar  
522 excess of inhibitor **7** for 2 hours at room temperature. Reactions were then analyzed by LC-MS



523 using a Shimadzu LC and autosampler system (Shimadzu, Marlborough, MA) interfaced to an  
524 LTQ ion trap mass spectrometer (ThermoFisher Scientific, San Jose, CA). Protein (5 ug) was  
525 injected onto a self-packed RP column (5 cm POROS 50R2, Applied Biosystems, Foster City,  
526 CA), desalted for 4 minutes with 100%A, eluted with a ballistic gradient (0-100% B in 1 minute;  
527 A= 0.2 M acetic acid in water, B= 0.2M acetic acid in acetonitrile), and introduced to the mass  
528 spectrometer by ESI (spray voltage = 4.5 kV). The mass spectrometer was programmed to  
529 collect full scan mass spectra in profile mode ( $m/z$  300-2000). Mass spectra were deconvoluted  
530 using MagTran version 1.03b2.<sup>47</sup>

531 To determine the site of modification, compound 7 modified protein was analyzed as  
532 described above, except that the LC system was interfaced to an Orbitrap Lumos Mass  
533 Spectrometer (ThermoFisher Scientific). The mass spectrometer was programmed to perform  
534 continuous cycles consisting of 1 MS scan ( $m/z$  300-2000, profile mode, electron multiplier  
535 detection) followed by ETD MS/MS scans targeting the +41 charge state precursor of compound  
536 7 modified protein (ETD reagent target = 200 ms, image current detection at 60K resolution,  
537 target value=2E6, ETD reaction time= 100 or 200 ms). Ion assignments were performed using  
538 mzStudio software.<sup>48</sup>

539 **Effect of Compound 7 on FXR.** LanthaScreen TR-FRET Coactivator Assay (Invitrogen,  
540 Carlsbad, CA) was used to test the effect of compound 7 on FXR. Test compounds were diluted  
541 in DMSO, and assays were run per the manufacturer's instructions. Known FXR agonist  
542 GW4064 (Sigma, G5172) was used as a positive control (agonism assay) or added at its EC<sub>50</sub>  
543 (50.3 nM, measured in this assay) (antagonism assay). Following 1 hour incubation at room  
544 temperature, the 520/495 TR-FRET ratio was measured with a PerkinElmer Envision fluorescent  
545 plate reader using the following filter set: excitation 340 nm, emission 495 nm, and emission 520

546 nm. A 100  $\mu$ sec delay followed by a 200  $\mu$ sec integration time was used to collect the time-  
547 resolved signal.

548 **Cell Culture.** Caco-2 cells were obtained from American Type Culture Collection (Manassas,  
549 VA). Caco-2 cells were maintained in Minimum Essential Medium (MEM) supplemented with  
550 GlutaMAX and Earle's Salts (Gibco, Life Technologies, UK). All cell culture media were  
551 supplemented with 10% fetal bovine serum (FBS), 100 units/ml penicillin, and 100 $\mu$ g/ml  
552 streptomycin (GenClone). Cells were grown in FBS- and antibiotic-supplemented 'complete'  
553 media at 37°C in an atmosphere of 5% CO<sub>2</sub>.

554 **Cell Viability Assay.** Caco-2 cells were treated with compound **7** diluted in DMSO in complete  
555 MEM media. The concentration of DMSO was kept constant and used as a negative control.  
556 Cells were incubated with compound **7** overnight at 37°C in an atmosphere of 5% CO<sub>2</sub>. The next  
557 day, cells were treated with 0.25% trypsin in HBSS (GenClone) for 10 min at 37°C. Cell  
558 viability was measured in Countess II automated cell counter (Invitrogen). Percentage relative  
559 viability was calculated compared to DMSO control.

560 **Plasmids and Transient Transfections.** For luciferase reporter assays, vectors expressing  
561 human reporter constructs were used. The pGL4.29[luc2P/CRE/Hygro] plasmid (Promega  
562 Corporation) was transiently transfected in Caco-2 cells at a concentration of 2  $\mu$ g/ml of media  
563 each for studying TGR5 activation respectively. The pGL4.74[hRluc/CMV] plasmid (Promega  
564 Corporation) was used as a transfection efficiency control at a concentration of 0.05  $\mu$ g/ml of  
565 media. All plasmids were transfected using Opti-MEM (Gibco) and Lipofectamine 2000  
566 (Invitrogen, Life Technologies, Grand Island, NY, USA) according to manufacturer's  
567 instructions. Plasmid transfections were performed in antibiotic-free MEM media with 10%

568 FBS. After overnight incubation, compound **7** and/or bile acids were added in complete media.  
569 Compound **7** and/or bile acids were diluted in DMSO and the concentration of DMSO was kept  
570 constant. 10  $\mu$ M of LCA was added along with compound **7** to study TGR5 antagonism and  
571 incubated overnight. Cells were harvested the next day for luciferase assay.

572 **Luciferase Reporter Assay.** Luminescence was measured using the Dual-Luciferase Reporter  
573 Assay System (Promega Corporation) according to manufacturer's instructions. Cells were  
574 washed gently with PBS and lysed in PLB from the kit. Matrigel-attached cells were scraped in  
575 PLB. Luminescence was measured using a SpectraMax M5 plate reader (Molecular Devices, San  
576 Jose, CA) at the ICCB-Longwood Screening Facility at HMS. Luminescence was normalized to  
577 *Renilla* luciferase activity and percentage relative luminescence was calculated compared to  
578 DMSO control.

579 **Screen of Inhibitors in Conventional Mouse Feces.** BSH activity in fecal pellets were  
580 quantified using a modified version of a published method.<sup>49</sup> Fecal pellets (approximately 10-20  
581 mg) were broken into fine particles in buffer (10% PBS, 90% sodium acetate at pH 5.2) to obtain  
582 a concentration of 1 mg/mL. 20  $\mu$ M of inhibitors and CAPE were added to the fecal slurry and  
583 the mixture was incubated at 37 °C for 30 mins. 100  $\mu$ M glycochenodeoxycholic acid-d4  
584 (GCDCA-d4) was then added to the mixture and the mixture was incubated at 37 °C for 18  
585 hours. The tubes were then frozen in dry ice for 5 mins and upon thawing were diluted with an  
586 equal volume of methanol. The slurry was then centrifuged at 12,500g for 10 mins. The  
587 supernatant was decanted into a clean Eppendorf tube and centrifuged again. The supernatant  
588 was then transferred to MS vials and analyzed by UPLC-MS using a previously published  
589 method.<sup>16</sup>

590 **Animal Studies.** C57BL/6 mice obtained from Jackson laboratories were maintained under a  
591 strict 12 h/12h light/dark cycle and a constant temperature ( $21 \pm 1$  °C) and humidity (55–65%).  
592 All experiments were conducted on 8–9 week old male mice. The mice were maintained on a  
593 standard chow diet (LabDiet, no. 5053) for the duration of the experiment. Mice were split into  
594 two groups of four mice each. The vehicle group were gavaged with 200  $\mu$ L of corn oil  
595 containing 5% DMSO. The experimental group were gavaged with 200  $\mu$ L of corn oil containing  
596 compound 7 at a concentration of 1.25 mg /mL. For the fecal pellet collection, each mouse was  
597 transferred to a temporary cage for a few minutes until it defecated. Once these fresh fecal pellets  
598 were collected, the mice were transferred back to their home cages. All experiments involving  
599 mice were performed using IACUC approved by the Beth Israel Deaconess Medical Center.

600 **BSH Activity in Feces.** BSH activity in fecal pellets were quantified using a modified version of  
601 a published method.<sup>49</sup> Fecal pellets (approximately 10-20 mg) were suspended in buffer (10%  
602 PBS, 90% sodium acetate at pH 5.2) containing 100  $\mu$ M glycochenodeoxycholic acid-d4  
603 (GCDCA-d4) to obtain a concentration of 20 mg/mL. The fecal pellets were broken into fine  
604 particles and the mixture was incubated at 37 °C for 25 mins. Samples were analyzed as per the  
605 method described in “Screen of Inhibitors in Conventional Mouse Feces.

606 **Quantification of Fecal Bile Acids.** Bile acid extraction and analysis of pre-massed fecal pellets  
607 (~10-20 mg/sample) was performed using a previously published method.<sup>16</sup>

608 **Determination of Microbial Biomass.** Frozen fecal pellets were used to determine colony  
609 forming units (CFU/g). Feces were suspended in PBS buffer in an anaerobic chamber. Serial  
610 dilutions were plated on CHG agar plates and incubated at 37 °C.

611

## 612 References

- 613 1. Ridlon, J. M., Kang, D.-J. & Hylemon, P. B. Bile salt biotransformations by human  
614 intestinal bacteria. *J. Lipid Res.* **47**, 241–259 (2006).
- 615 2. Fiorucci, S. & Distrutti, E. Bile Acid-Activated Receptors, Intestinal Microbiota, and the  
616 Treatment of Metabolic Disorders. *Trends Mol Med* **21**, 702–714 (2015).
- 617 3. Setchell, K. D., Lawson, A. M., Tanida, N. & Sjövall, J. General methods for the analysis  
618 of metabolic profiles of bile acids and related compounds in feces. *J. Lipid Res.* **24**, 1085–  
619 1100 (1983).
- 620 4. Hamilton, J. P. *et al.* Human cecal bile acids: concentration and spectrum. *Am. J. Physiol.*  
621 *Gastrointest. Liver Physiol.* **293**, G256–G263 (2007).
- 622 5. Modica, S., Gadaleta, R. M. & Moschetta, A. Deciphering the nuclear bile acid receptor  
623 FXR paradigm. *Nucl Recept Signal* **8**, e005 (2010).
- 624 6. Vavassori, P., Mencarelli, A., Renga, B., Distrutti, E. & Fiorucci, S. The bile acid receptor  
625 FXR is a modulator of intestinal innate immunity. *J. Immunol.* **183**, 6251–6261 (2009).
- 626 7. Pols, T. W. H. *et al.* Lithocholic acid controls adaptive immune responses by inhibition of  
627 Th1 activation through the Vitamin D receptor. *PLOS ONE* **12**, e0176715 (2017).
- 628 8. Begley, M., Hill, C. & Gahan, C. G. M. Bile salt hydrolase activity in probiotics. *Appl.*  
629 *Environ. Microbiol.* **72**, 1729–1738 (2006).
- 630 9. Chiang, J. Y. Recent advances in understanding bile acid homeostasis. *F1000Res* **6**, 2029  
631 (2017).
- 632 10. Song, Z. *et al.* Taxonomic profiling and populational patterns of bacterial bile salt  
633 hydrolase (BSH) genes based on worldwide human gut microbiome. *Microbiome* **7**, 9  
634 (2019).
- 635 11. Strelow, J. M. A Perspective on the Kinetics of Covalent and Irreversible Inhibition. *SLAS*  
636 *Discov* **22**, 3–20 (2017).
- 637 12. Hamilton, J. P. *et al.* Human cecal bile acids: concentration and spectrum. *Am. J. Physiol.*  
638 *Gastrointest. Liver Physiol.* **293**, G256–G263 (2007).
- 639 13. Roberts, A. B. *et al.* Development of a gut microbe-targeted nonlethal therapeutic to  
640 inhibit thrombosis potential. *Nat. Med.* **24**, 1407–1417 (2018).
- 641 14. Rossocha, M., Schultz-Heienbrok, R., Moeller, von, H., Coleman, J. P. & Saenger, W.  
642 Conjugated bile acid hydrolase is a tetrameric N-terminal thiol hydrolase with specific  
643 recognition of its cholyl but not of its tauryl product. *Biochem.* **44**, 5739–5748 (2005).
- 644 15. Huijghebaert, S. M. & Hofmann, A. F. Influence of the amino acid moiety on  
645 deconjugation of bile acid amidates by cholyglycine hydrolase or human fecal cultures. *J.*  
646 *Lipid Res.* **27**, 742–752 (1986).
- 647 16. Yao, L. *et al.* A selective gut bacterial bile salt hydrolase alters host metabolism. *eLife* **7**,  
648 675 (2018).
- 649 17. Liu, Q. *et al.* Developing Irreversible Inhibitors of the Protein Kinase Cysteine. *Chemistry & Biology* **20**, 146–159 (2013).
- 651 18. Gehringer, M. & Laufer, S. A. Emerging and Re-Emerging Warheads for Targeted  
652 Covalent Inhibitors: Applications in Medicinal Chemistry and Chemical Biology. *Journal*  
653 *of Medicinal Chemistry* [acs.jmedchem.8b01153](https://doi.org/10.1021/acs.jmedchem.8b01153) (2019).  
654 doi:10.1021/acs.jmedchem.8b01153
- 655 19. Wilson, A. J., Kerns, J. K., Callahan, J. F. & Moody, C. J. Keep calm, and carry on  
656 covalently. *Journal of Medicinal Chemistry* **56**, 7463–7476 (2013).
- 657 20. Serafimova, I. M. *et al.* Reversible targeting of noncatalytic cysteines with chemically

- 658 tuned electrophiles. *Nature Chemical Biology* **8**, 471–476 (2012).
- 659 21. Henise, J. C. & Taunton, J. Irreversible Nek2 kinase inhibitors with cellular activity.  
660 *Journal of Medicinal Chemistry* **54**, 4133–4146 (2011).
- 661 22. Xie, T. *et al.* Pharmacological targeting of the pseudokinase Her3. *Nature Chemical*  
662 *Biology* **10**, 1006–1012 (2014).
- 663 23. Quintás-Cardama, A., Kantarjian, H., Cortes, J. & Verstovsek, S. Janus kinase inhibitors  
664 for the treatment of myeloproliferative neoplasias and beyond. *Nature Reviews Drug*  
665 *Discovery* **10**, 127–140 (2011).
- 666 24. Cohen, M. S., Zhang, C., Shokat, K. M. & Taunton, J. Structural bioinformatics-based  
667 design of selective, irreversible kinase inhibitors. *Science* **308**, 1318–1321 (2005).
- 668 25. Yang, W. *et al.* MX1013, a dipeptide caspase inhibitor with potent in vivo antiapoptotic  
669 activity. *Br. J. Pharmacol.* **140**, 402–412 (2003).
- 670 26. Angliker, H., Wikstrom, P., Rauber, P. & Shaw, E. The synthesis of lysylfluoromethanes  
671 and their properties as inhibitors of trypsin, plasmin and cathepsin B. *Biochem. J.* **241**,  
672 871–875 (1987).
- 673 27. Garland, M. *et al.* Covalent Modifiers of Botulinum Neurotoxin Counteract Toxin  
674 Persistence. *ACS Chem. Biol.* **14**, 76–87 (2019).
- 675 28. Miller, R. M. & Taunton, J. Targeting protein kinases with selective and semipromiscuous  
676 covalent inhibitors. *Meth. Enzymol.* **548**, 93–116 (2014).
- 677 29. Coleman, J. P. & Hudson, L. L. Cloning and characterization of a conjugated bile acid  
678 hydrolase gene from *Clostridium perfringens*. *Appl. Environ. Microbiol.* **61**, 2514–2520  
679 (1995).
- 680 30. Tanaka, H., Hashiba, H., Kok, J. & Mierau, I. Bile salt hydrolase of *Bifidobacterium*  
681 *longum*-biochemical and genetic characterization. *Appl. Environ. Microbiol.* **66**, 2502–  
682 2512 (2000).
- 683 31. Wang, Z. *et al.* Identification and Characterization of a Bile Salt Hydrolase from  
684 *Lactobacillus salivarius* for Development of Novel Alternatives to Antibiotic Growth  
685 Promoters. *Appl. Environ. Microbiol.* **78**, 8795–8802 (2012).
- 686 32. Stellwag, E. J. & Hylemon, P. B. Purification and characterization of bile salt hydrolase  
687 from *Bacteroides fragilis* subsp. *fragilis*. *Biochimica et Biophysica Acta (BBA) -*  
688 *Enzymology* **452**, 165–176 (1976).
- 689 33. Smith, K., Zeng, X. & Lin, J. Discovery of bile salt hydrolase inhibitors using an efficient  
690 high-throughput screening system. *PLOS ONE* **9**, e85344 (2014).
- 691 34. Sayin, S. I. *et al.* Gut microbiota regulates bile acid metabolism by reducing the levels of  
692 tauro-beta-muricholic acid, a naturally occurring FXR antagonist. *Cell Metab.* **17**, 225–  
693 235 (2013).
- 694 35. Hofmann, A. F. The function of bile salts in fat absorption. The solvent properties of  
695 dilute micellar solutions of conjugated bile acids. *Biochem. J.* **89**, 57–68 (1963).
- 696 36. Kraal, L., Abubucker, S., Kota, K., Fischbach, M. A. & Mitreva, M. The prevalence of  
697 species and strains in the human microbiome: a resource for experimental efforts. *PLOS*  
698 *ONE* **9**, e97279 (2014).
- 699 37. Li, F. *et al.* Microbiome remodelling leads to inhibition of intestinal farnesoid X receptor  
700 signalling and decreased obesity. *Nat Commun* **4**, 2384 (2013).
- 701 38. Wallace, B. D. *et al.* Alleviating cancer drug toxicity by inhibiting a bacterial enzyme.  
702 *Science* **330**, 831–835 (2010).
- 703 39. Joyce, S. A. *et al.* Regulation of host weight gain and lipid metabolism by bacterial bile

- 704 acid modification in the gut. *Proc. Natl. Acad. Sci. U.S.A.* **111**, 7421–7426 (2014).  
705 40. Ma, C. *et al.* Gut microbiome-mediated bile acid metabolism regulates liver cancer via  
706 NKT cells. *Science* **360**, eaan5931 (2018).  
707 41. Kabsch, W. XDS. *Acta Crystallogr. D Biol. Crystallogr.* **66**, 125–132 (2010).  
708 42. McCoy, A. J. *et al.* Phaser crystallographic software. *J Appl Crystallogr* **40**, 658–674  
709 (2007).  
710 43. Emsley, P. & Cowtan, K. Coot: model-building tools for molecular graphics. *Acta*  
711 *Crystallogr. D Biol. Crystallogr.* **60**, 2126–2132 (2004).  
712 44. Afonine, P. V. *et al.* Towards automated crystallographic structure refinement with  
713 phenix.refine. *Acta Crystallogr. D Biol. Crystallogr.* **68**, 352–367 (2012).  
714 45. Chen, V. B. *et al.* MolProbity: all-atom structure validation for macromolecular  
715 crystallography. *Acta Crystallogr. D Biol. Crystallogr.* **66**, 12–21 (2010).  
716 46. Morin, A. *et al.* Collaboration gets the most out of software. *eLife* **2**, e01456 (2013).  
717 47. Zhang, Z. & Marshall, A. G. A universal algorithm for fast and automated charge state  
718 deconvolution of electrospray mass-to-charge ratio spectra. *J. Am. Soc. Mass Spectrom.* **9**,  
719 225–233 (1998).  
720 48. Ficarro, S. B., Alexander, W. M. & Marto, J. A. mzStudio: A Dynamic Digital Canvas for  
721 User-Driven Interrogation of Mass Spectrometry Data. *Proteomes* **5**, 20 (2017).  
722 49. Xie, C. *et al.* An Intestinal Farnesoid X Receptor-Ceramide Signaling Axis Modulates  
723 Hepatic Gluconeogenesis in Mice. *Diabetes* **66**, 613–626 (2017).  
724



**a**
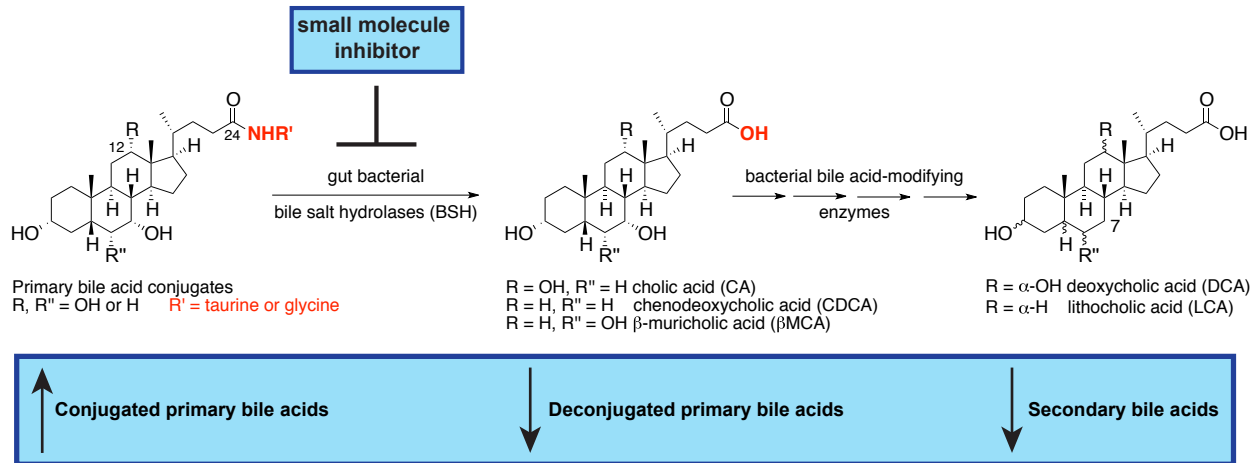
**b**
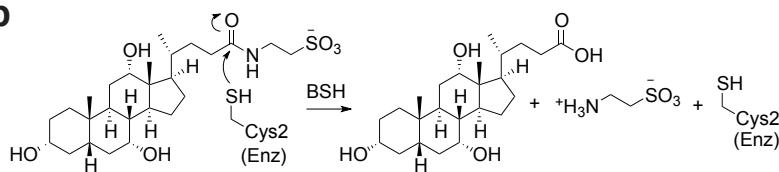
**d**
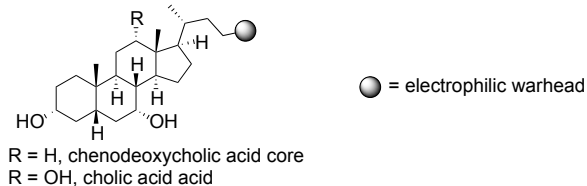
**c**
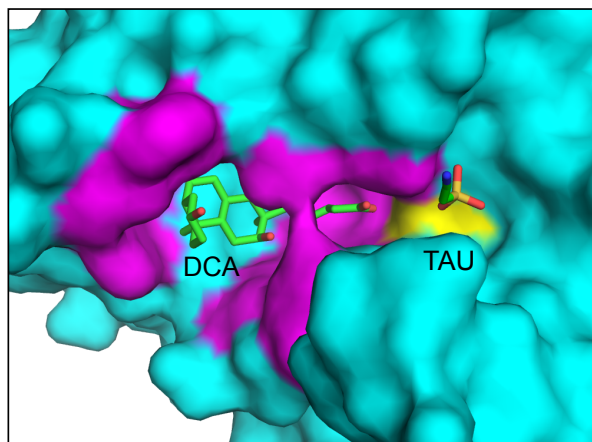
**e**
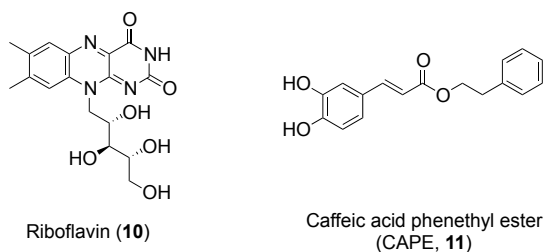
**analog**
**electrophilic warhead**

 1,  $R = \text{H}$ 
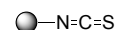
 2,  $R = \text{H}$ 
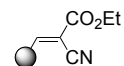
 3,  $R = \text{H}$ 
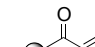
 4,  $R = \text{H}$ 
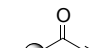
 5,  $R = \text{H}$ 
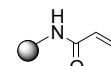
 6,  $R = \text{H}$ 
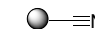
 7,  $R = \text{H}$ 
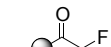
 8,  $R = \text{H}$ 
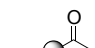
 9,  $R = \text{OH}$ 
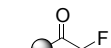



**a**

## Inhibitor screen vs *B. theta* BSH

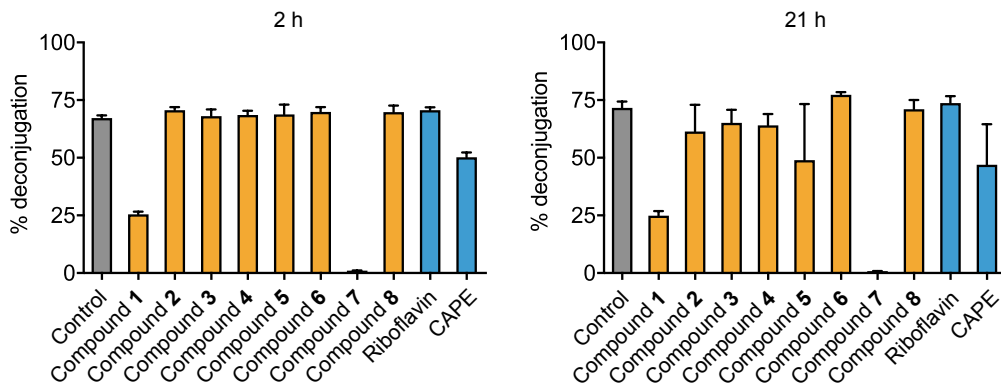

**b**

## Inhibitor screen vs *B. longum* BSH

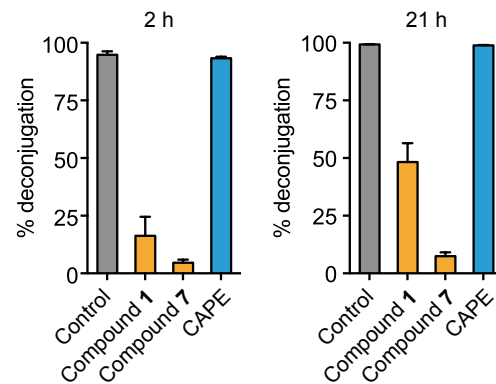

**c**

## Bacterial culture, BSH activity

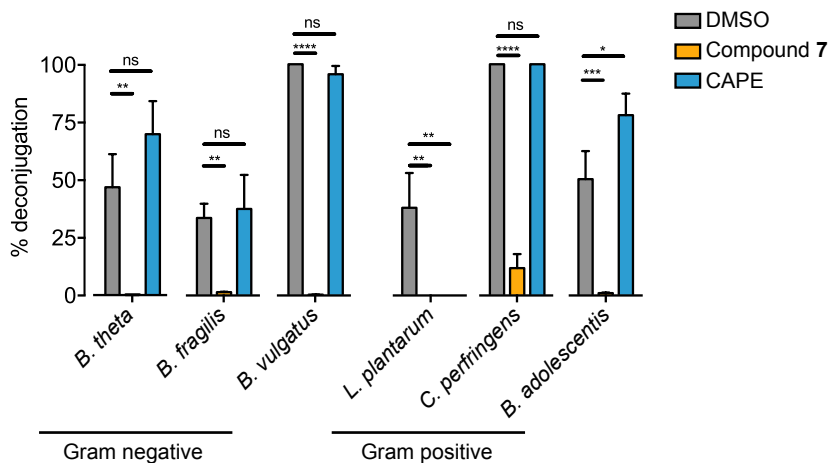

**d**

## Bacterial cell viability, 24h

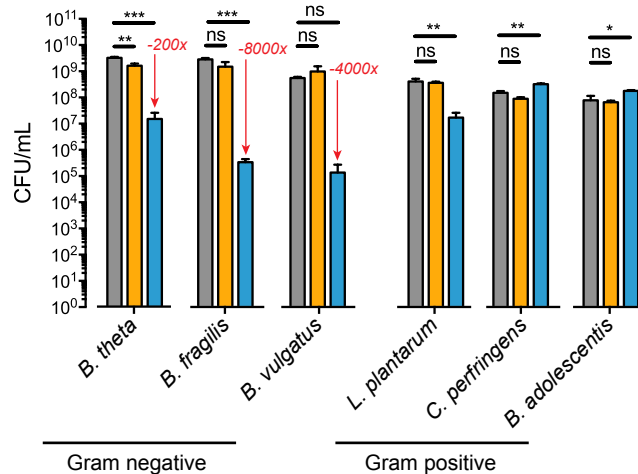

**a**

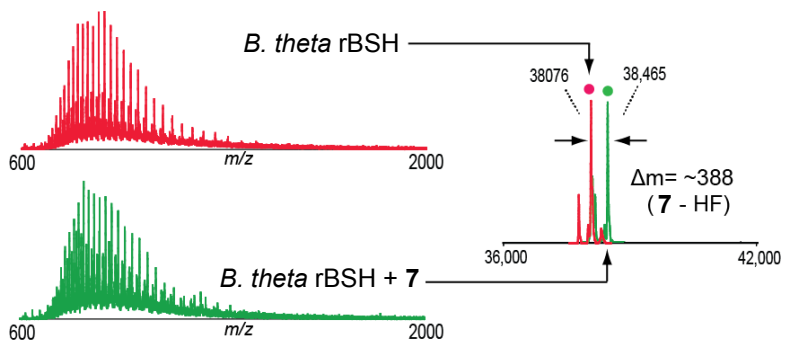

**b**

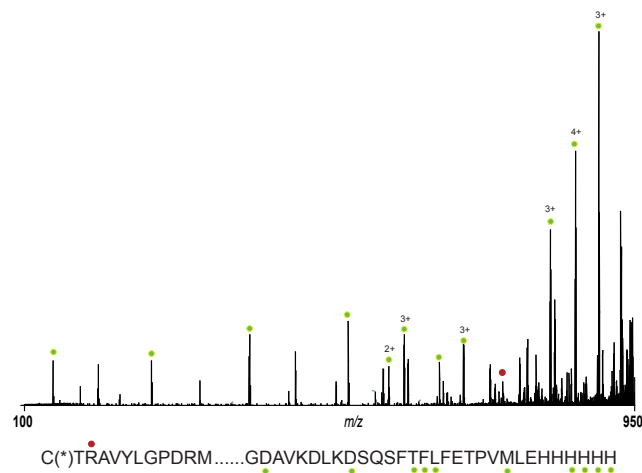

**c**

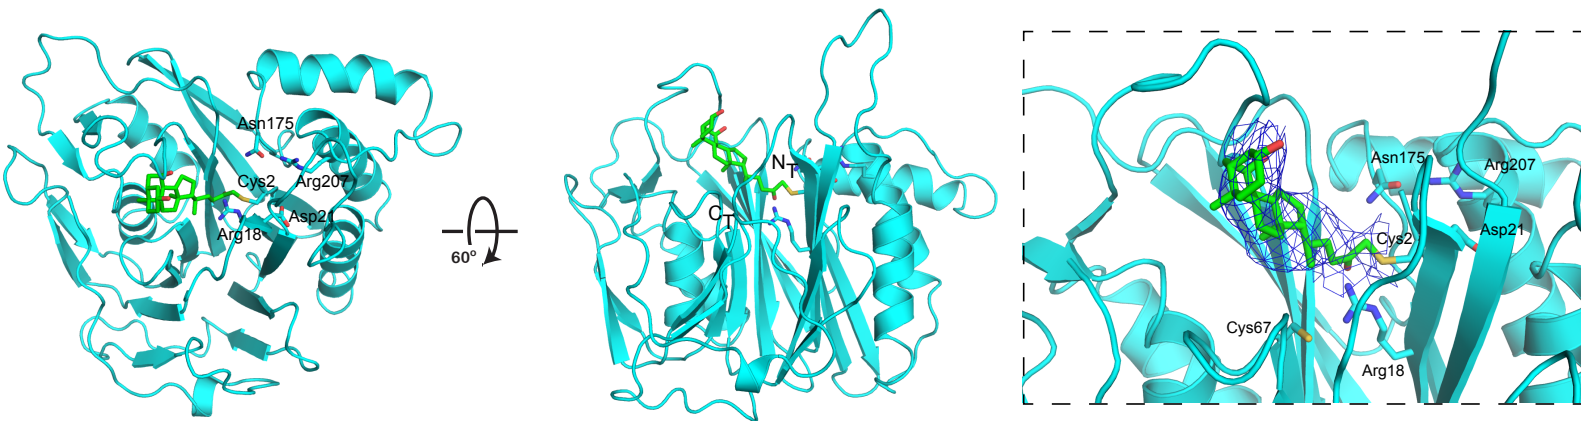

**Figure 4****a** *FXR agonist activity*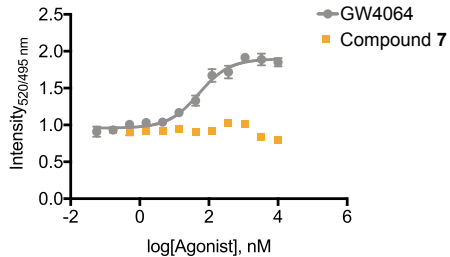**b** *TGR5 agonist activity*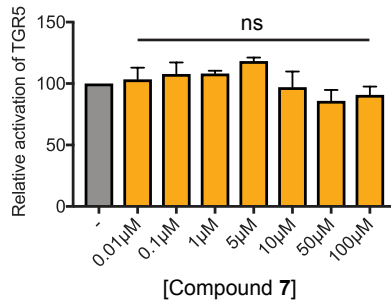**c** *Caco-2 cell viability*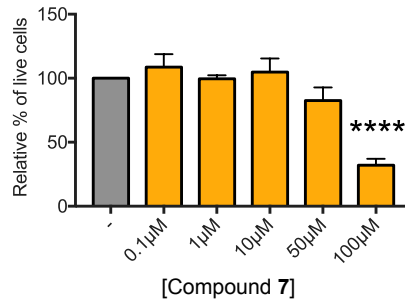

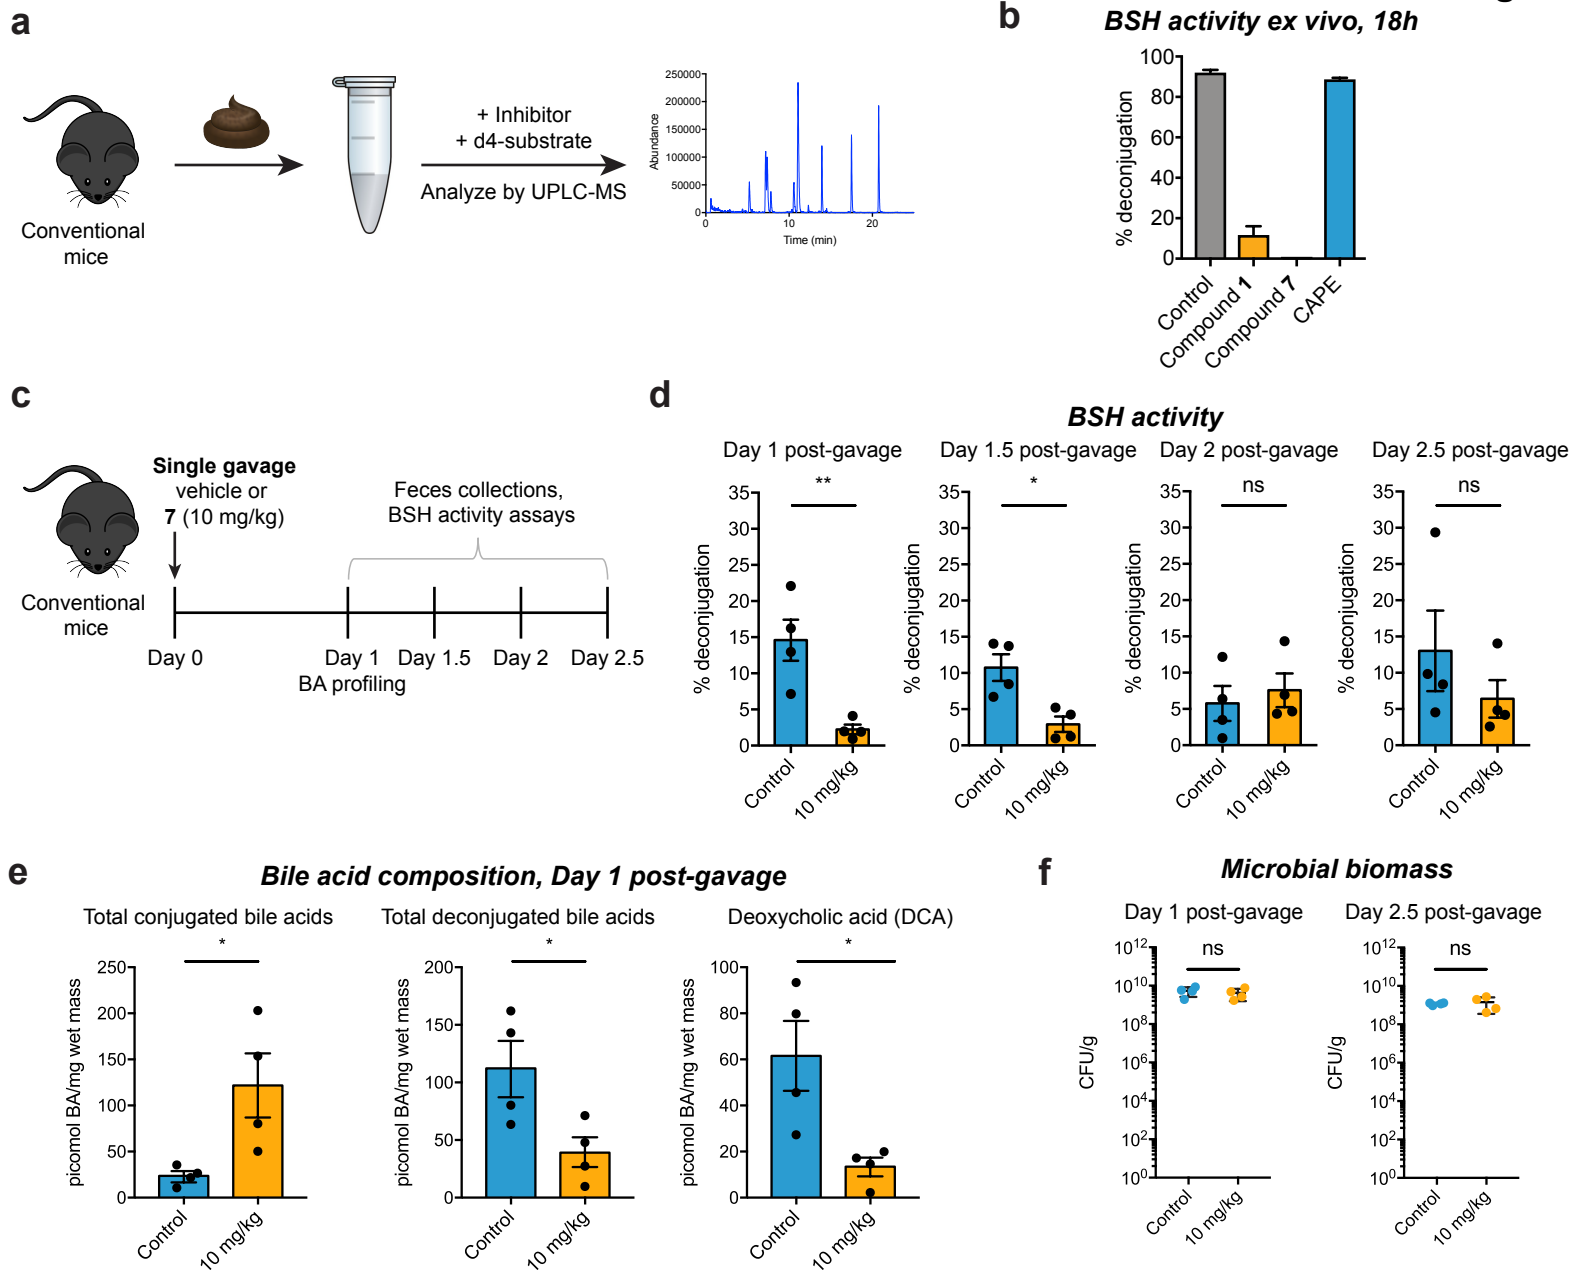

Source: https://www.biorxiv.org/content/10.1101/640086v1.full.pdf
